# Supplementary material for: Blood Test Results of Pregnant COVID-19 Patients: An Updated Case-Control Study
Source: PubMed Central journal article supplement (PMC7575733; doi:10.3389/fcimb.2020.560899), 2020-10-07
Supplement: Data_Sheet_1.pdf [file Data_Sheet_1.pdf]

**Table S1. Sociodemographic characteristics of pregnant COVID-19 patients with chronic disease**

|                                 | COVID-19 patients with chronic disease | COVID-19 patients without chronic disease | <i>P</i> |
|---------------------------------|----------------------------------------|-------------------------------------------|----------|
|                                 | N (%) / N ±SD                          | N (%) / N ±SD                             |          |
| Age                             | 31.00 ±3.83                            | 30.92 ±4.61                               | 0.9397   |
| Parity                          |                                        |                                           |          |
| 1                               | 19 (79.17)                             | 21 (58.33)                                | -        |
| 2                               | 5 (20.83)                              | 14 (38.89)                                |          |
| 3                               | 0                                      | 1 (2.78)                                  |          |
| fetus number                    |                                        |                                           |          |
| 1                               | 23 (95.83)                             | 36 (100.00)                               | -        |
| 2                               | 1 (4.17)                               | 0                                         |          |
| Gestational week of delivery    | 37.67 ±2.12                            | 38.00 ±2.53                               | 0.5964   |
| Gestational week of delivery    |                                        |                                           |          |
| <37                             | 5 (20.83)                              | 5 (13.89)                                 | 0.4832   |
| ≥37                             | 19 (79.17)                             | 31 (86.11)                                |          |
| Delivery                        |                                        |                                           |          |
| Vaginal delivery                | 2 (8.33)                               | 15 (41.67)                                | 0.0054   |
| Cesarean delivery               | 22 (91.67)                             | 21 (58.33)                                |          |
| First symptoms                  |                                        |                                           |          |
| None                            | 12 (50.00)                             | 14 (38.89)                                | 0.3988   |
| Fever before or during delivery | 4 (16.67)                              | 7 (19.44)                                 | 0.7871   |
| Fever after delivery            | 8 (33.33)                              | 15 (41.67)                                | 0.5189   |
| Respiratory symptoms            | 4 (16.67)                              | 5 (13.89)                                 | 0.7697   |
| Neonatal birthweight (g)        | 3204 ±609                              | 3230 ±639                                 | 0.8760   |
| 1-minute Apgar scores           |                                        |                                           |          |
| 10                              | 14 (58.33)                             | 24 (66.67)                                | 0.5152   |
| <10                             | 10 (41.67)                             | 12 (33.33)                                |          |
| 5-minute Apgar scores           |                                        |                                           |          |
| 10                              | 23 (95.83)                             | 34 (94.44)                                | 0.8105   |
| <10                             | 1 (4.17)                               | 2 (5.56)                                  |          |

**Table S2. Blood test results of pregnant COVID-19 patients and control group**

|                                 | COVID-19 patients |       | Control patients |        | <i>P</i> |
|---------------------------------|-------------------|-------|------------------|--------|----------|
|                                 | N                 | %     | N                | %      |          |
| WBC, 10 <sup>9</sup> /L         |                   |       |                  |        |          |
| 3.5-9.5                         | 30                | 50.00 | 66               | 55.00  | 0.5273   |
| >9.5                            | 30                | 50.00 | 54               | 45.00  |          |
| Lymphocytes, 10 <sup>9</sup> /L |                   |       |                  |        |          |
| <1.1                            | 26                | 43.33 | 19               | 15.83  | 0.0003   |
| 1.1-3.2                         | 33                | 55.00 | 97               | 80.83  |          |
| >3.2                            | 1                 | 1.67  | 4                | 3.33   |          |
| Neutrophils, 10 <sup>9</sup> /L |                   |       |                  |        |          |
| 40-75                           | 13                | 21.67 | 40               | 33.33  | 0.1064   |
| >75                             | 47                | 78.33 | 80               | 66.67  |          |
| CRP, mg/L                       |                   |       |                  |        |          |
| <4                              | 24                | 40.00 | 74               | 61.67  | 0.0061   |
| ≥4                              | 36                | 60.00 | 46               | 38.33  |          |
| ALT, U/L                        |                   |       |                  |        |          |
| 0-35                            | 58                | 96.67 | 120              | 100.00 | -        |
| >35                             | 2                 | 3.33  | 0                | 0      |          |
| AST, U/L                        |                   |       |                  |        |          |
| 0-35                            | 55                | 91.67 | 119              | 99.17  | 0.0084   |
| >35                             | 5                 | 8.33  | 1                | 0.83   |          |
| TBil, umol/L                    |                   |       |                  |        |          |
| <5                              | 7                 | 11.67 | 35               | 29.17  | 0.0091   |
| 5-21                            | 53                | 88.33 | 85               | 70.83  |          |
| TP, g/L                         |                   |       |                  |        |          |
| <66                             | 25                | 41.67 | 50               | 41.67  | -        |
| 66-83                           | 35                | 58.33 | 70               | 58.33  |          |
| ALB, g/L                        |                   |       |                  |        |          |
| <35                             | 24                | 40.00 | 47               | 39.17  | 0.9144   |
| 35-52                           | 36                | 60.00 | 73               | 60.83  |          |
| GLB, g/L                        |                   |       |                  |        |          |
| <20                             | 1                 | 1.67  | 0                | 0      | -        |
| 20-40                           | 59                | 98.33 | 119              | 99.17  |          |
| >40                             | 0                 | 0     | 1                | 0.83   |          |

Abbreviations: WBC: white blood cell; CRP: C-reactive protein; ALT: alanine aminotransferase; AST: aspartate aminotransferase; TBil: total bilirubin; TP: total protein; ALB: albumin; GLB: globulin.

**Table S3. Blood test results of pregnant COVID-19 patients and control pregnant patients with diabetes**

|                                 | COVID-19 patients with diabetes |        | COVID-19 patients without diabetes |       | Control patients with diabetes |        | <i>P</i> |
|---------------------------------|---------------------------------|--------|------------------------------------|-------|--------------------------------|--------|----------|
|                                 | N                               | %      | N                                  | %     | N                              | %      |          |
| WBC, 10 <sup>9</sup> /L         |                                 |        |                                    |       |                                |        |          |
| 3.5-9.5                         | 8                               | 61.54  | 72                                 | 51.06 | 16                             | 61.54  | 0.2703   |
| >9.5                            | 5                               | 38.46  | 69                                 | 48.94 | 10                             | 38.46  |          |
| Lymphocytes, 10 <sup>9</sup> /L |                                 |        |                                    |       |                                |        |          |
| <1.1                            | 6                               | 46.15  | 36                                 | 25.53 | 3                              | 11.54  | 0.3115   |
| ≥1.1                            | 7                               | 53.85  | 105                                | 74.47 | 23                             | 88.46  |          |
| Neutrophils, 10 <sup>9</sup> /L |                                 |        |                                    |       |                                |        |          |
| 40-75                           | 3                               | 23.08  | 39                                 | 27.66 | 11                             | 42.31  | 0.1849   |
| >75                             | 10                              | 76.92  | 102                                | 72.34 | 15                             | 57.69  |          |
| CRP, mg/L                       |                                 |        |                                    |       |                                |        |          |
| <4                              | 6                               | 46.15  | 76                                 | 53.90 | 16                             | 61.54  | 0.5888   |
| ≥4                              | 7                               | 53.85  | 65                                 | 46.10 | 10                             | 38.46  |          |
| ALT, U/L                        |                                 |        |                                    |       |                                |        |          |
| 0-35                            | 13                              | 100.00 | 139                                | 98.58 | 26                             | 100.00 | -        |
| >35                             | 0                               | 0      | 2                                  | 1.42  | 0                              | 0      |          |
| AST, U/L                        |                                 |        |                                    |       |                                |        |          |
| 0-35                            | 11                              | 84.62  | 137                                | 97.16 | 26                             | 100.00 | -        |
| >35                             | 2                               | 15.38  | 4                                  | 2.84  | 0                              | 0      |          |
| TBil, umol/L                    |                                 |        |                                    |       |                                |        |          |
| <5                              | 2                               | 15.38  | 32                                 | 22.70 | 8                              | 30.77  | 0.4897   |
| 5-21                            | 11                              | 84.62  | 109                                | 77.30 | 18                             | 69.23  |          |
| TP, g/L                         |                                 |        |                                    |       |                                |        |          |
| <66                             | 7                               | 53.85  | 61                                 | 43.26 | 7                              | 26.92  | 0.2032   |
| 66-83                           | 6                               | 46.15  | 80                                 | 56.74 | 19                             | 73.08  |          |
| ALB, g/L                        |                                 |        |                                    |       |                                |        |          |
| <35                             | 6                               | 46.15  | 60                                 | 42.55 | 5                              | 19.23  | 0.0420   |
| 35-52                           | 7                               | 53.85  | 81                                 | 57.45 | 21                             | 80.77  |          |
| GLB, g/L                        |                                 |        |                                    |       |                                |        |          |
| <20                             | 0                               | 0      | 1                                  | 0.71  | 0                              | 0      | -        |
| 20-40                           | 13                              | 100.00 | 139                                | 98.58 | 26                             | 100.00 |          |
| >40                             | 0                               | 0      | 1                                  | 0.71  | 0                              | 0      |          |

Abbreviations: WBC: white blood cell; CRP: C-reactive protein; ALT: alanine aminotransferase; AST: aspartate aminotransferase; TBil: total bilirubin; TP: total protein; ALB: albumin; GLB: globulin.

**Table S4. Blood test results of pregnant COVID-19 patients and control pregnant patients with hypertension**

|                                 | COVID-19 patients with hypertension |        | COVID-19 patients without hypertension |       | Control patients with hypertension |        | <i>P</i> |
|---------------------------------|-------------------------------------|--------|----------------------------------------|-------|------------------------------------|--------|----------|
|                                 | N                                   | %      | N                                      | %     | N                                  | %      |          |
| WBC, 10 <sup>9</sup> /L         |                                     |        |                                        |       |                                    |        |          |
| 3.5-9.5                         | 7                                   | 63.64  | 82                                     | 55.78 | 7                                  | 31.82  | 0.0662   |
| >9.5                            | 4                                   | 36.36  | 65                                     | 44.22 | 15                                 | 68.18  |          |
| Lymphocytes, 10 <sup>9</sup> /L |                                     |        |                                        |       |                                    |        |          |
| <1.1                            | 2                                   | 18.18  | 41                                     | 27.89 | 2                                  | 9.09   | 0.0490   |
| ≥1.1                            | 9                                   | 81.82  | 106                                    | 72.11 | 20                                 | 90.91  |          |
| Neutrophils, 10 <sup>9</sup> /L |                                     |        |                                        |       |                                    |        |          |
| 40-75                           | 4                                   | 36.36  | 42                                     | 28.57 | 7                                  | 31.82  | 0.6630   |
| >75                             | 7                                   | 63.64  | 105                                    | 71.43 | 15                                 | 68.18  |          |
| CRP, mg/L                       |                                     |        |                                        |       |                                    |        |          |
| <4                              | 4                                   | 36.36  | 84                                     | 57.14 | 10                                 | 45.45  | 0.1892   |
| ≥4                              | 7                                   | 63.64  | 63                                     | 42.86 | 12                                 | 54.55  |          |
| ALT, U/L                        |                                     |        |                                        |       |                                    |        |          |
| 0-35                            | 10                                  | 90.91  | 146                                    | 99.32 | 22                                 | 100.00 | -        |
| >35                             | 1                                   | 9.09   | 1                                      | 0.68  | 0                                  | 0      |          |
| AST, U/L                        |                                     |        |                                        |       |                                    |        |          |
| 0-35                            | 9                                   | 81.82  | 143                                    | 97.28 | 22                                 | 100.00 | -        |
| >35                             | 2                                   | 18.18  | 4                                      | 2.72  | 0                                  | 0      |          |
| TBil, umol/L                    |                                     |        |                                        |       |                                    |        |          |
| <5                              | 1                                   | 9.09   | 36                                     | 24.49 | 5                                  | 22.73  | 0.6335   |
| 5-21                            | 10                                  | 90.91  | 111                                    | 75.51 | 17                                 | 77.27  |          |
| TP, g/L                         |                                     |        |                                        |       |                                    |        |          |
| <66                             | 6                                   | 54.55  | 58                                     | 39.46 | 11                                 | 50.00  | 0.2567   |
| 66-83                           | 5                                   | 45.45  | 89                                     | 60.54 | 11                                 | 50.00  |          |
| ALB, g/L                        |                                     |        |                                        |       |                                    |        |          |
| <35                             | 8                                   | 72.73  | 53                                     | 36.05 | 10                                 | 45.45  | 0.1559   |
| 35-52                           | 3                                   | 27.27  | 94                                     | 63.95 | 12                                 | 54.55  |          |
| GLB, g/L                        |                                     |        |                                        |       |                                    |        |          |
| <20                             | 0                                   | 0      | 1                                      | 0.68  | 0                                  | 0      | -        |
| 20-40                           | 11                                  | 100.00 | 146                                    | 99.32 | 21                                 | 95.45  |          |
| >40                             | 0                                   | 0      | 0                                      | 0     | 1                                  | 4.55   |          |

Abbreviations: WBC: white blood cell; CRP: C-reactive protein; ALT: alanine aminotransferase; AST: aspartate aminotransferase; TBil: total bilirubin; TP: total protein; ALB: albumin; GLB: globulin.
